# Supplementary material for: Helical ultrastructure of the L-ENA spore aggregation factor of a Bacillus paranthracis foodborne outbreak strain
Source: PubMed Central journal article supplement — Nat Commun. 2024 Aug 29;15:7514. doi: 10.1038/s41467-024-51804-w (PMC11362473; doi:10.1038/s41467-024-51804-w), 2024-08-29
Supplement: 41467_2024_51804_MOESM1_ESM.pdf [file 41467_2024_51804_MOESM1_ESM.pdf]

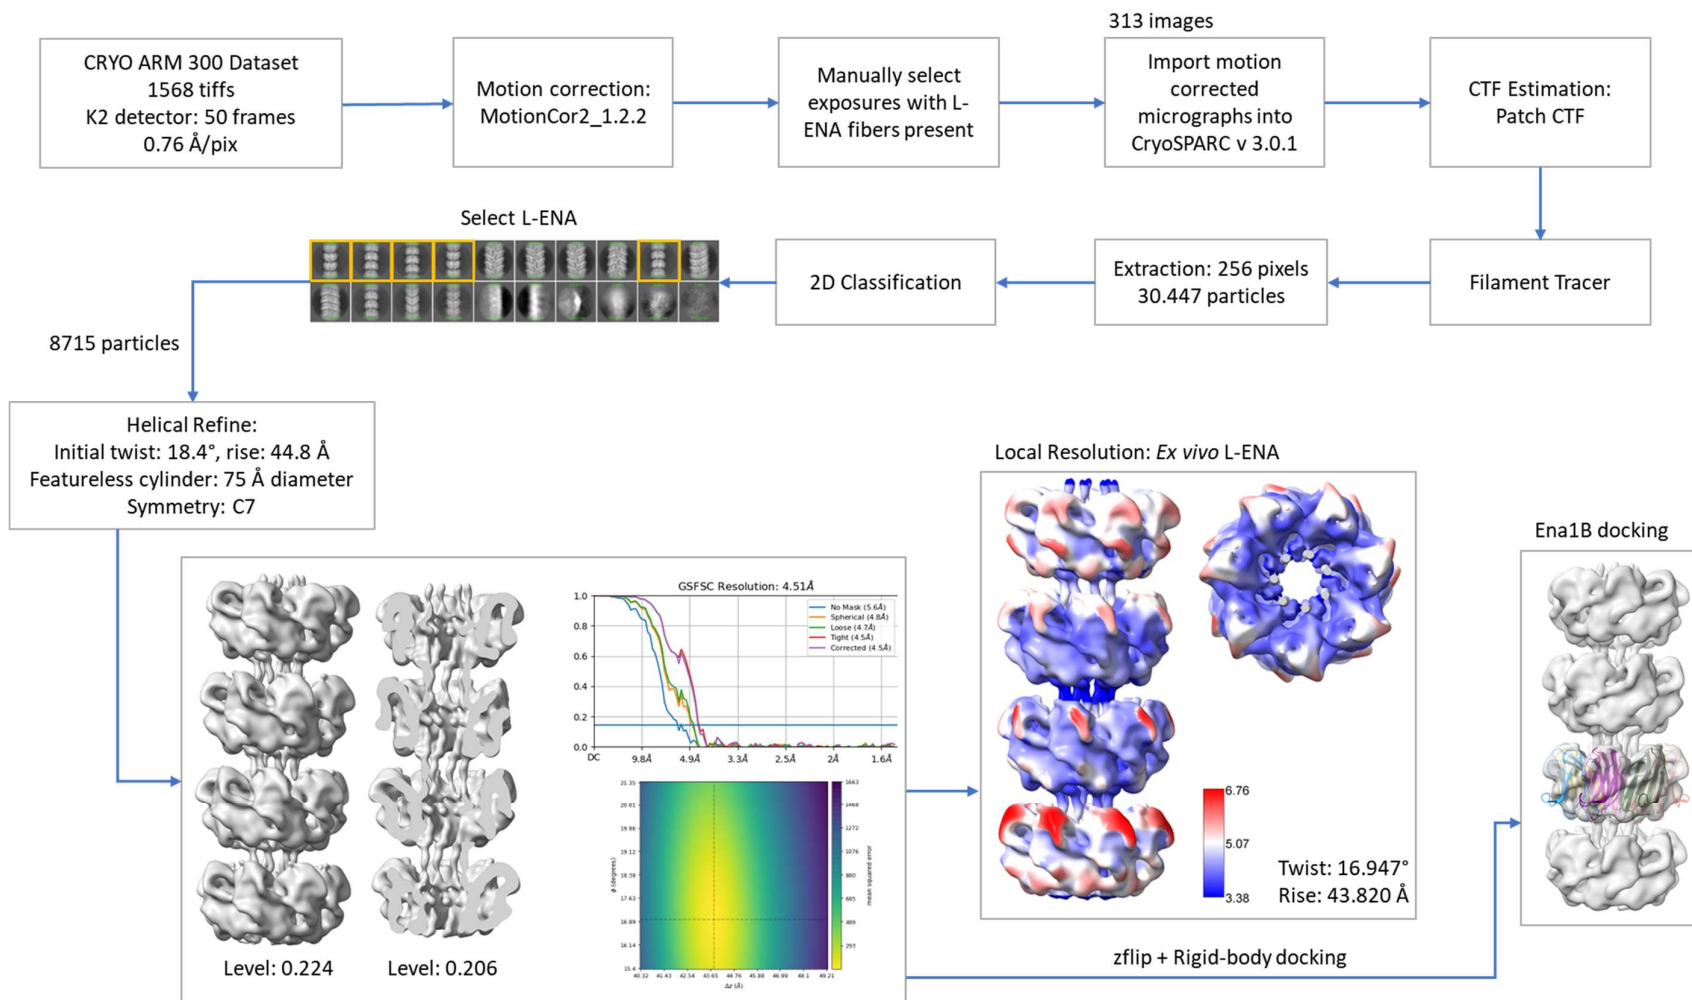

**Supplementary Figure 1:** CryoEM workflow for the *ex vivo* L-ENA fibers: Cryosparc processing workflow for the *ex vivo* L-type ENA fibers.

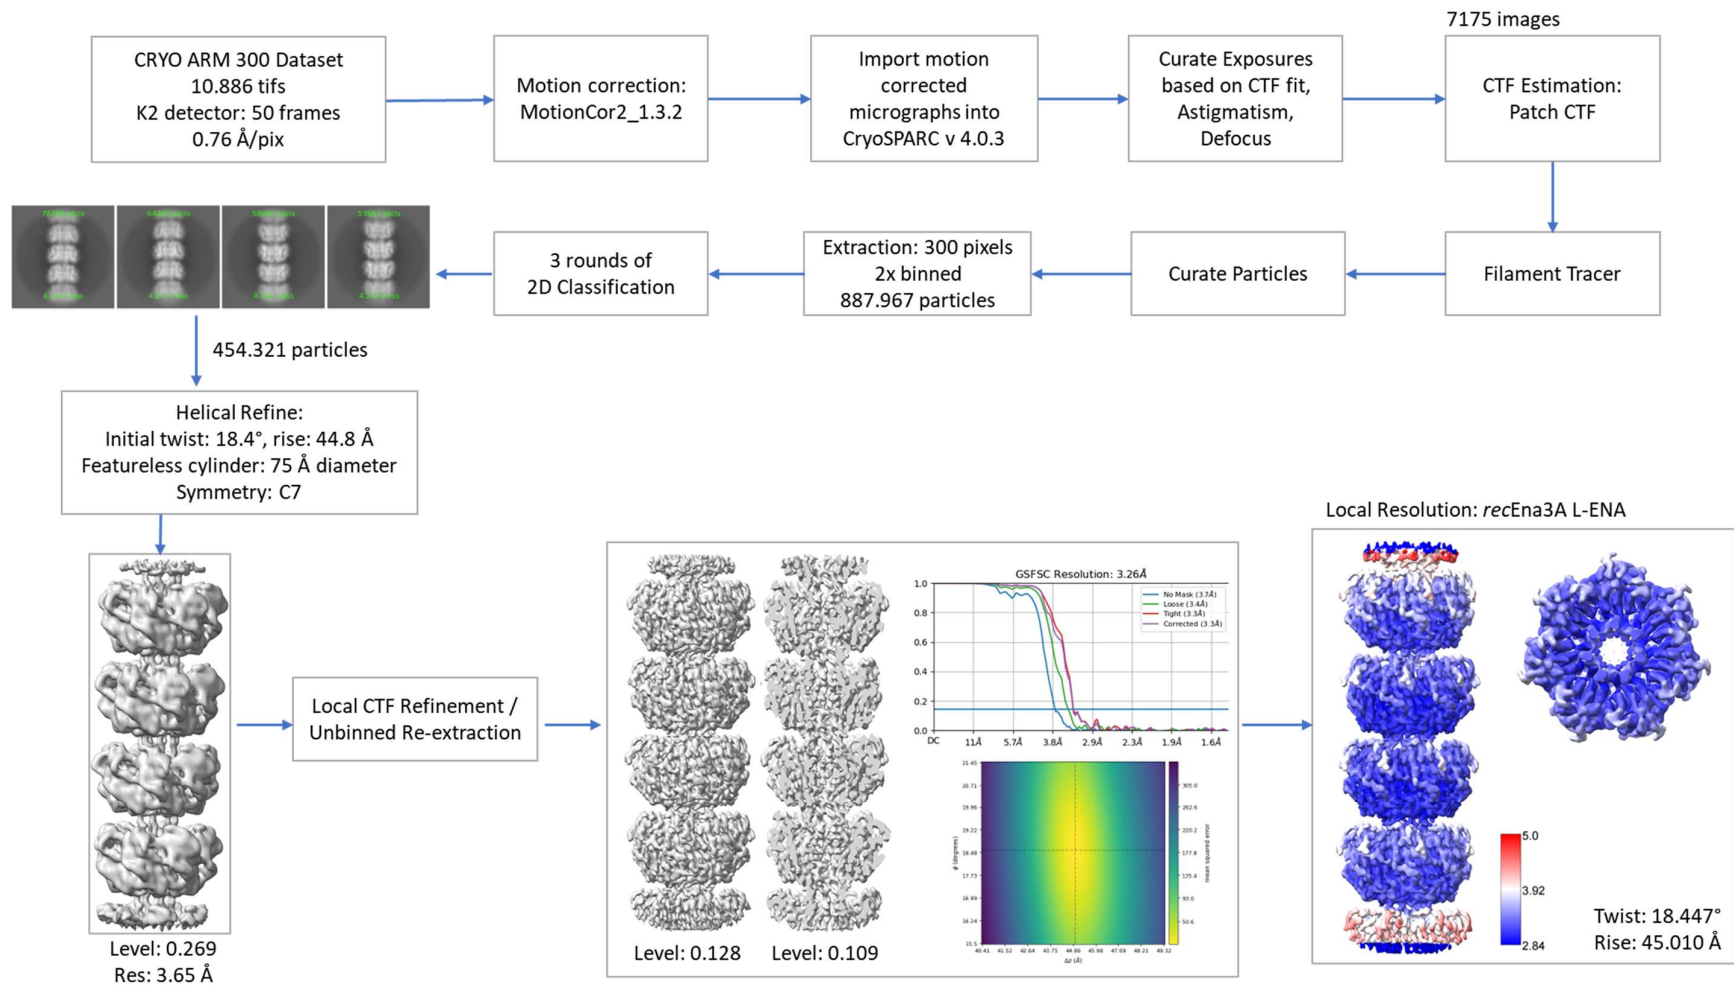

**Supplementary Figure 2:** CryoEM workflow for the *recEna3A* L-ENA fibers: Cryosparc processing workflow for the recombinant L-type ENA fibers.

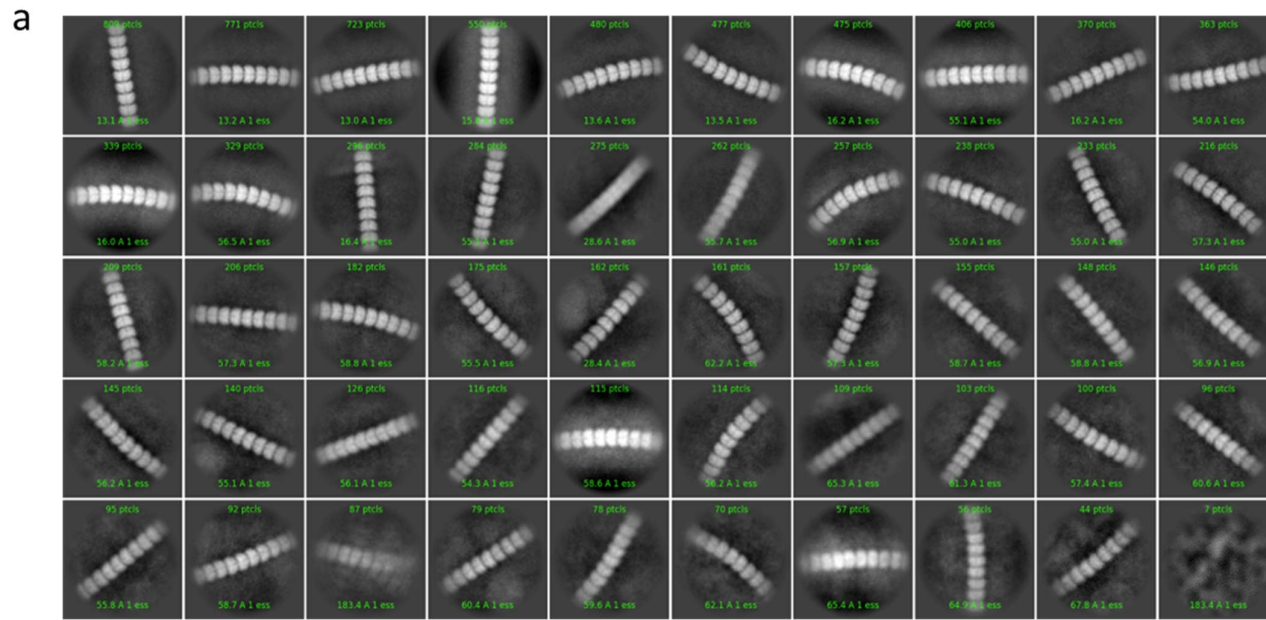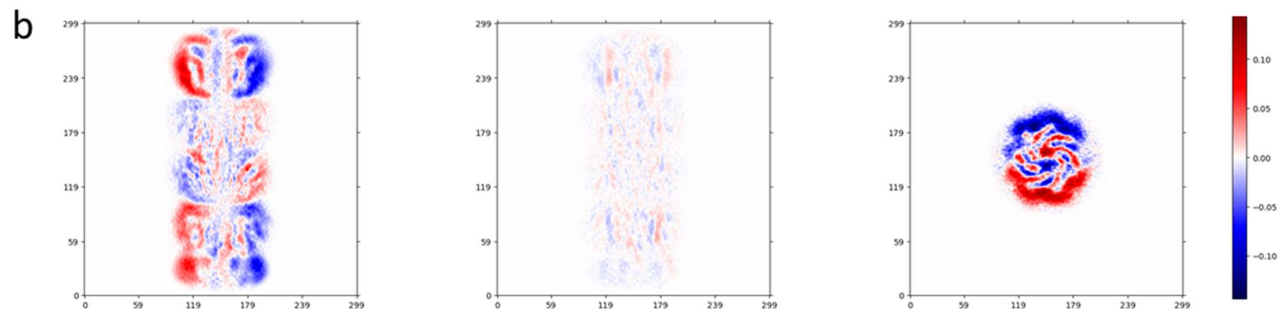

**Supplementary Figure 3:** Flexibility of *recEna3A* L-ENA fibers: (a) CryoSPARC (*J*) 2D class averages of L-ENA using a particle box size of 600x600pixels (0.76Å/pixel) after manual picking of high curvature L-ENA segments, (b) Cryosparc output for the mode 1 of the 3D variability analysis job on L-ENA (see Supplementary Movie 1 for a representation of the corresponding volume series).

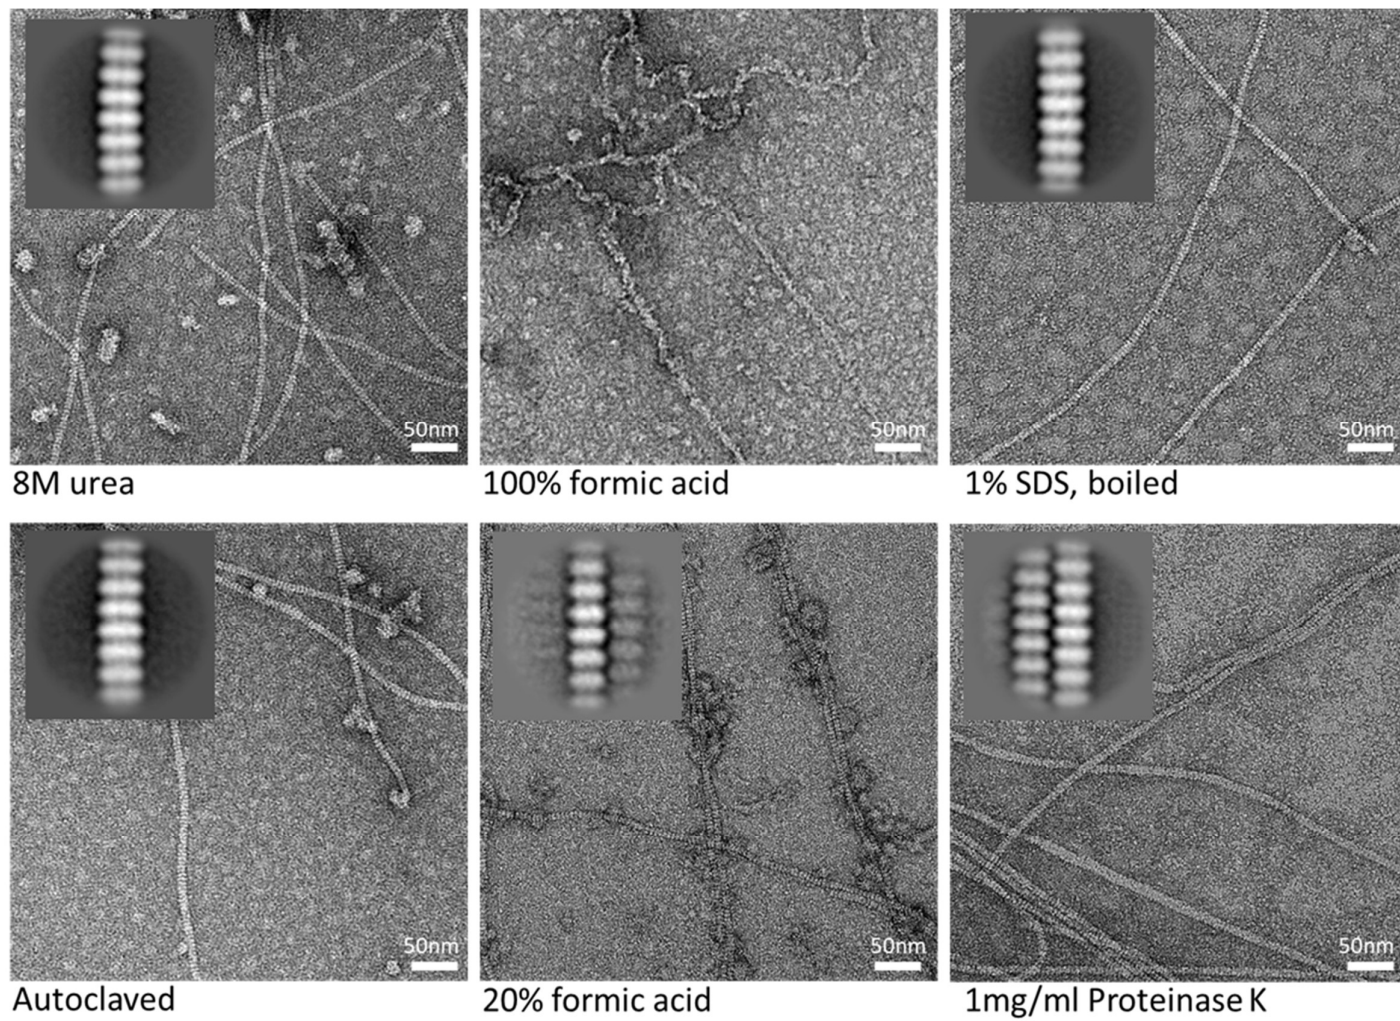

**Supplementary Figure 4:** Stability assay for recEna3A fibers: recombinant Ena3A fibers were incubated for 1h in 8M urea, 20% or 100% (v/v) formic acid, or boiled in 1% (w/v) SDS, autoclaved (121°C for 18min) in miliQ, or incubated in 1 mg.mL<sup>-1</sup> proteinase K in 33.3mM HEPES pH 7.5, 1mM CaCl<sub>2</sub> for 24h.



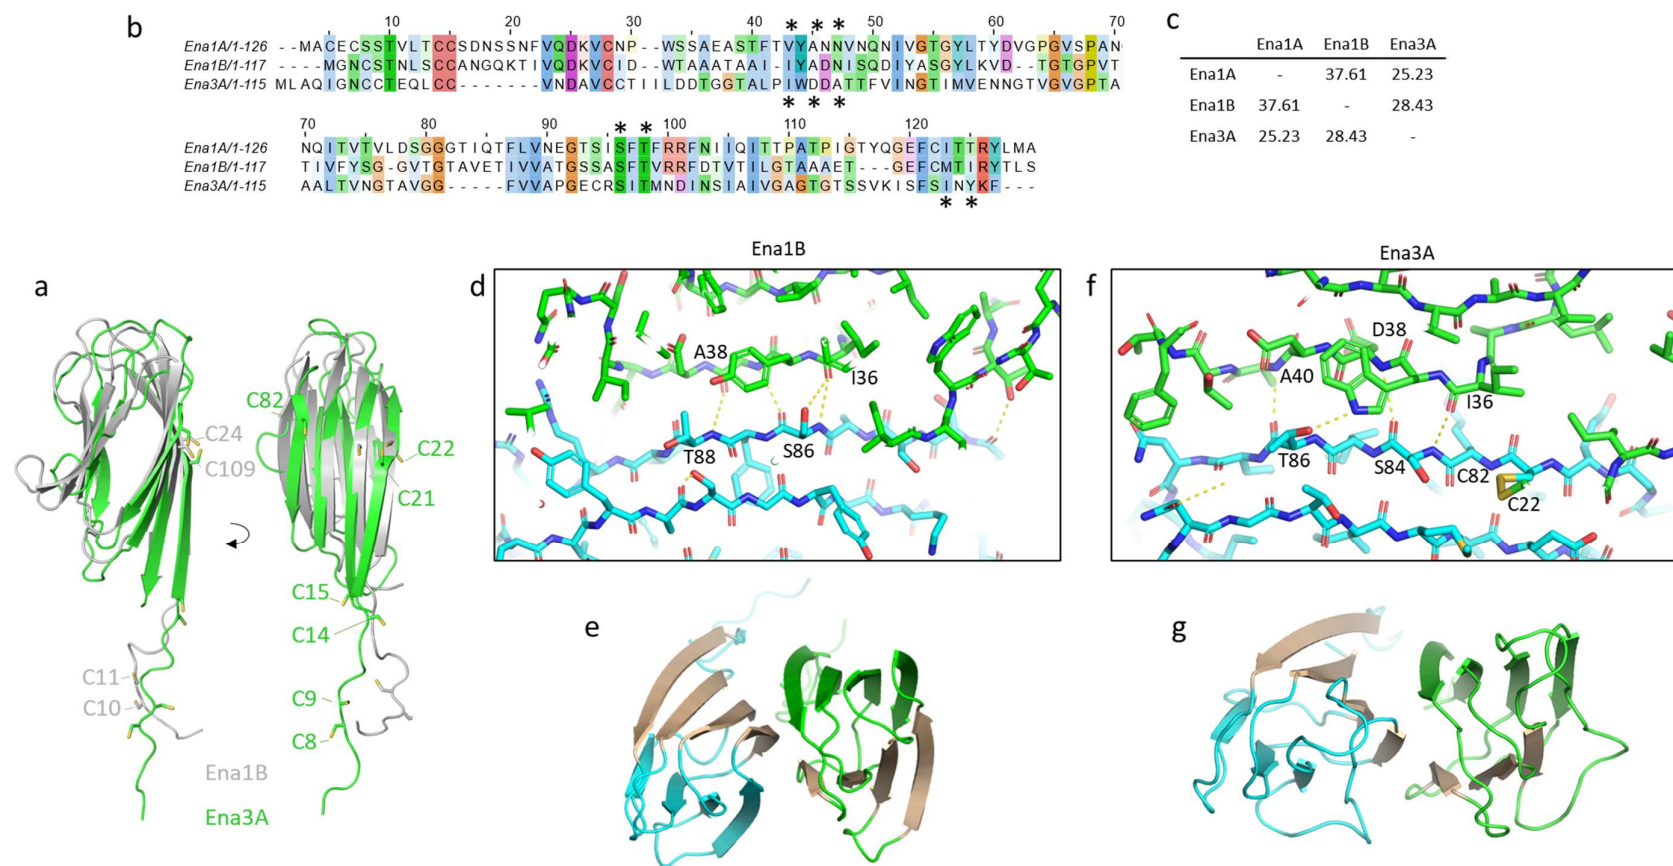

**Supplementary Figure 5:** Comparison between the major subunits of L- and S-type ENA fibers: (a) Structural comparison between Ena1B and Ena3A, (b) Multiple sequence alignment of the S-ENA subunits (Ena1A and Ena1B) and the L-ENA subunit (Ena3A). Residues involved in lateral contacts are highlighted with a star (above: S-ENA contact; below: L-ENA contacts), (c) percent identity matrix for Ena1A, Ena1B and Ena3A, (d) and (e) comparison between the  $\beta$ -sheet augmentation contacts at the Ena1B dimer interface (PDB: 7A02), and (f) and (g) the  $\beta$ -sheet augmentation at the Ena3A dimer interface. Inter-molecular hydrogen bonds (determined in PyMol 2.5.2 using “Find Polar between Chains”) shown in yellow, dashed lines.

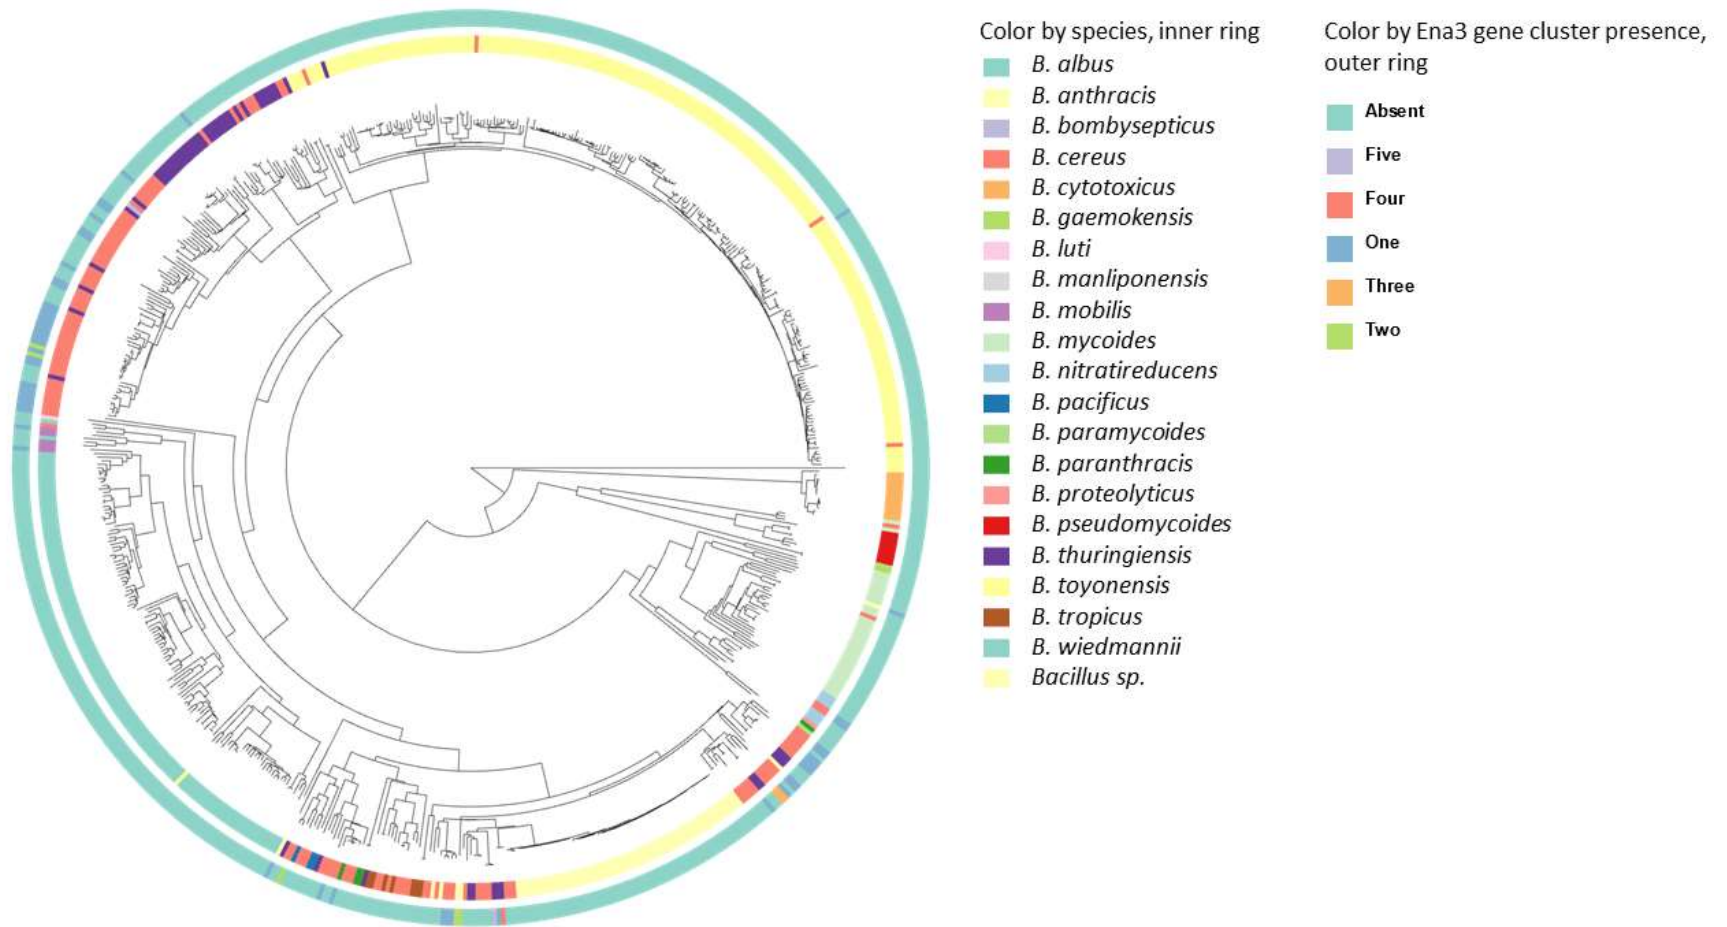

0.017

**Supplementary Figure 6:** Phylogenetic analysis of L-ENA occurrence: Clustering of 656 *B. cereus s.l.* genomes (*B. subtilis* is excluded from tree). Rings are colored according to designated species (inner ring) and presence and copy-number of *ena3A* gene cluster (outer ring). Tree is made using Mashtree (2), visualized using Microreact, and available at <https://microreact.org/project/uzm4JFrrsCPZeRnMpRqvvf-supplementary-figure-9-ena3-paper>.

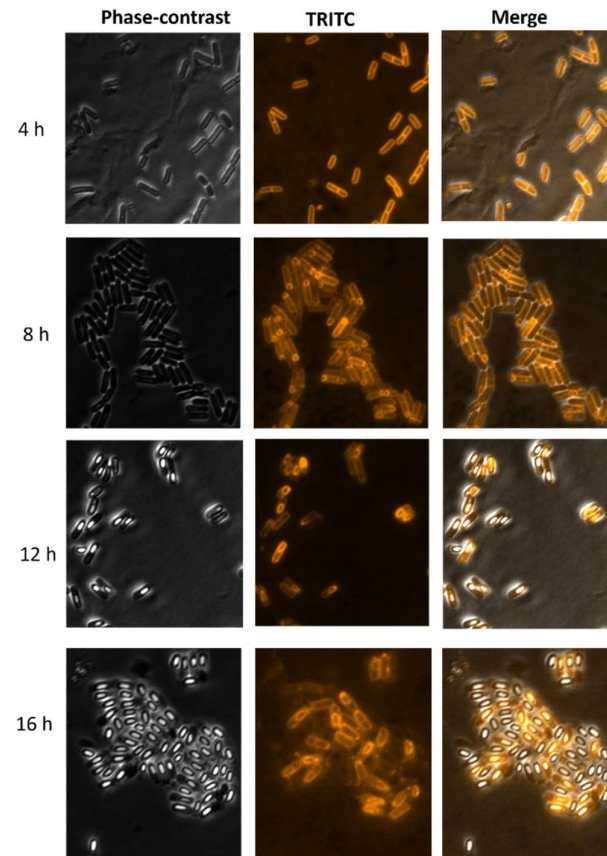

**Supplementary Figure 7:** Time-course fluorescence microscopy analysis of sporulation in *B. paranthracis* NVH0075-95: At specified time points, cells were stained with 10  $\mu$ M of FM4-64 dye and examined using a 100x phase-contrast objective of Nikon Eclipse Ti2 fluorescence microscope. Images were processed using Fiji (3).

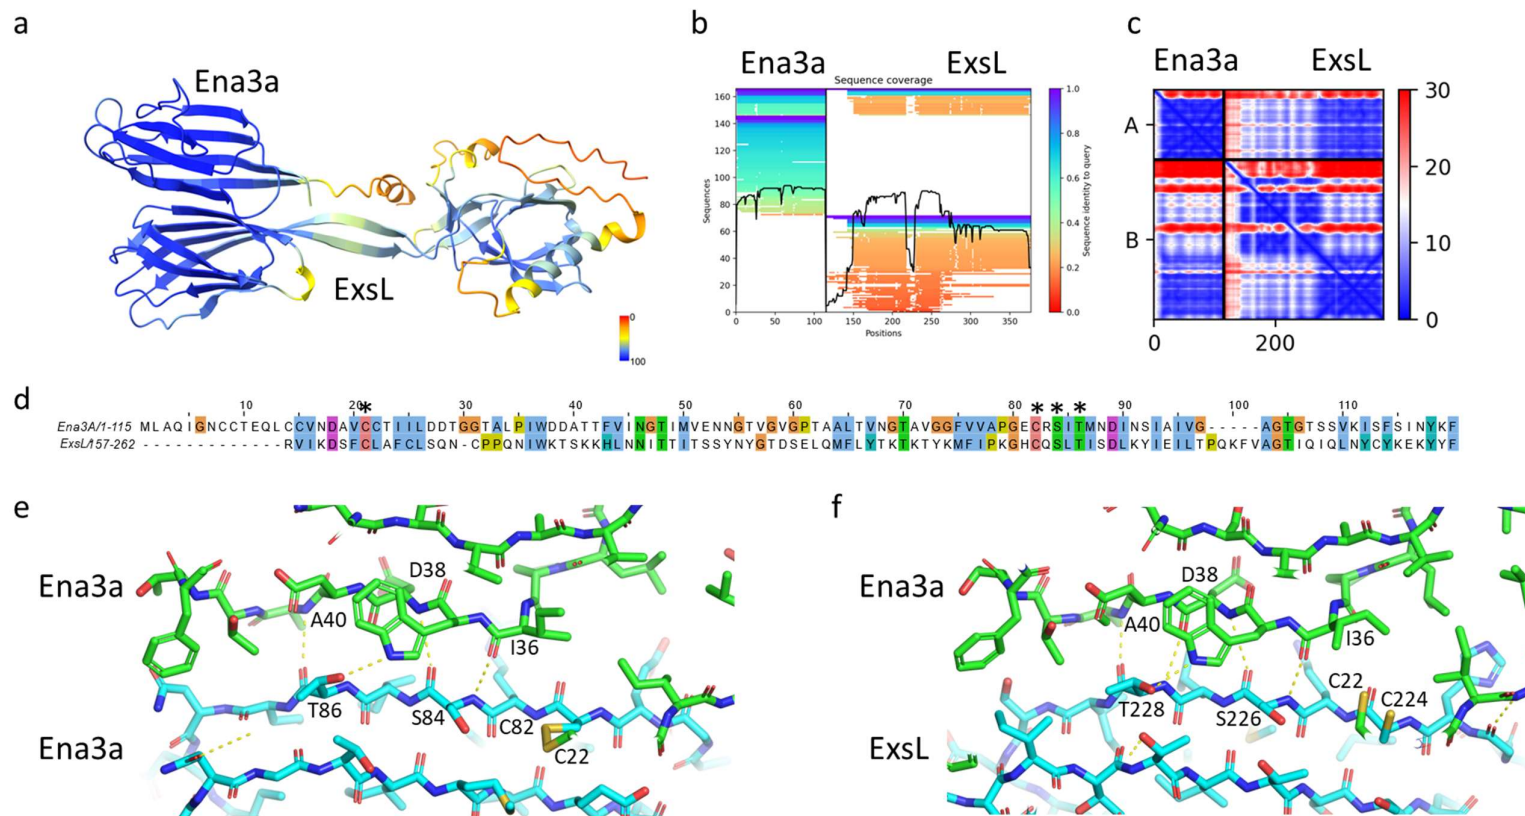

**Supplementary Figure 8:** AlphaFold2 multimer prediction of the ExsL-Ena3A dimeric complex: (a) AlphaFold-multimer 1.2 (4) ExsL-Ena3A dimer (pLDDT=82.6; ptmscore=0.73) colour coded according to pLDDT-score, (b) Sequence coverage of the corresponding ExsL-Ena3A multiple sequence alignment (source data is provided as a Source Data file), (c) Predicted aligned error map of the predicted ExsL-Ena3A dimer, (d) Pairwise sequence alignment (17.4% sequence identity) of Ena3A and the C-terminal Ena-core domain of ExsL (157-262). Residues involved in lateral Ena3A-Ena3A contacts (highlighted with a star) are conserved in ExsL, (e)  $\beta$ -sheet augmentation at the Ena3A dimer interface (determined via cryoEM), (f) Predicted  $\beta$ -sheet augmentation at the ExsL-Ena3A heterodimer interface (predicted using AF2 multimer). Inter-molecular hydrogen bonds (determined in PyMol 2.5.2 using “Find Polar between Chains”) shown in yellow, dashed lines.





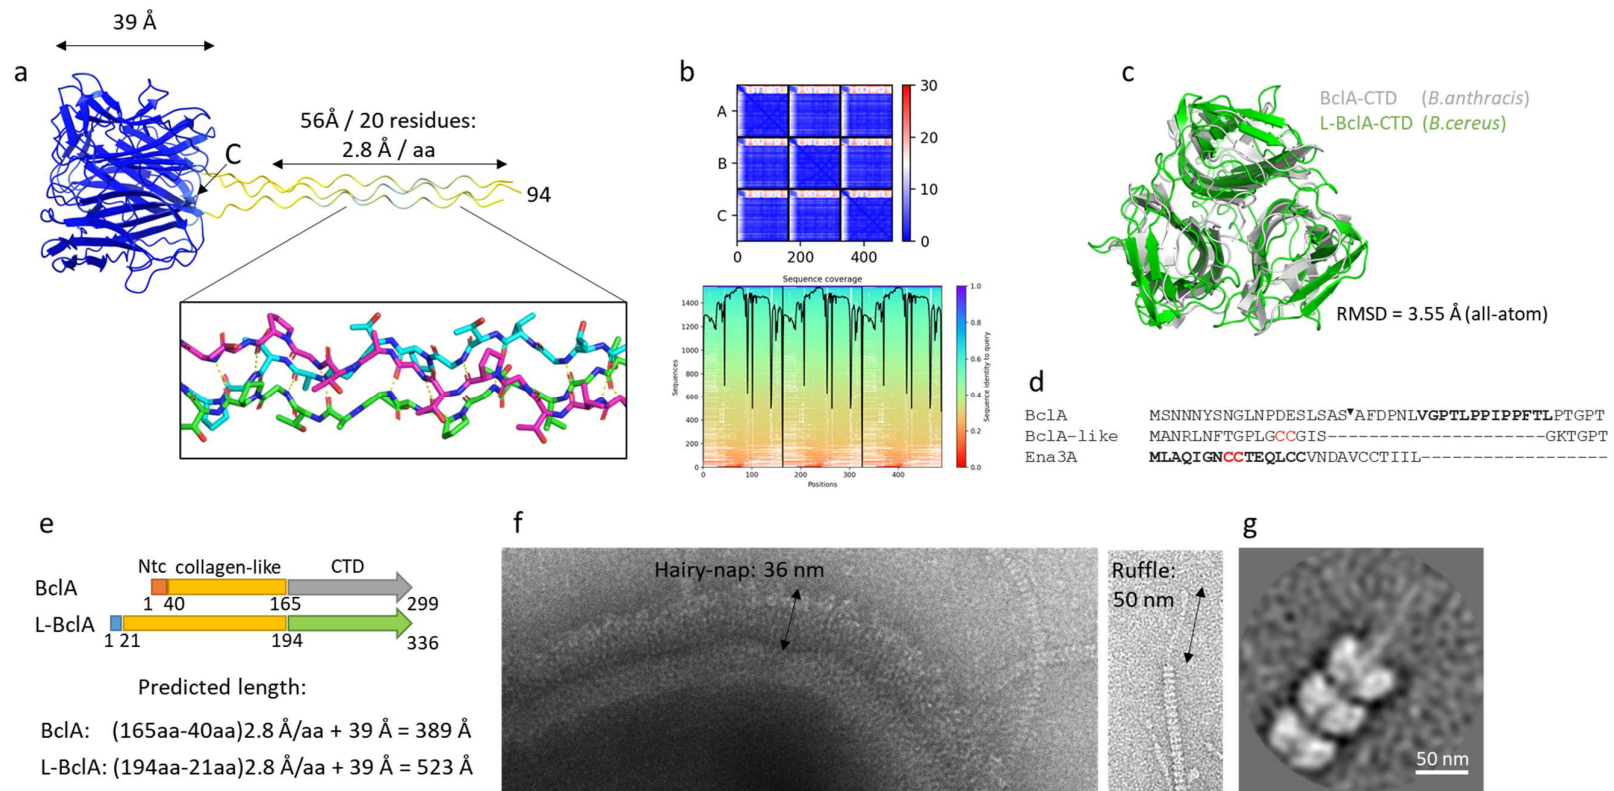

**Supplementary Figure 10:** Structural analysis of L-BclA: (a) AlphaFold-multimer v 1.2 prediction of an L-BclA<sub>94-267</sub> trimer (pLDDT=94, ptmscore=0.9) colour coded according to pLDDT-score (N-terminus omitted); collagen-like stalk region shown in stick representation with putative H-bonds shown in dashed lines, (b) Corresponding predicted aligned error map and sequence coverage (source data is provided as a Source Data file) of the multiple sequence alignment of the AF2 L-BclA<sub>94-267</sub> trimer, (c) superposition (all-atom RMSD = 3.55Å; sequence identity = 22.1%) of the AF2 L-BclA<sub>94-267</sub> trimer with the crystal structure of BclA-CTD of the hairy nap layer of *B. anthracis* (PDB: 1WCK), (d) N-terminal sequence of BclA, L-BclA and Ena3A: letters in bold for BclA correspond to the exosporium leader sequence, and the arrow marker indicates the proteolytic cleavage site. L-BclA has no identifiable exosporium leader sequence, nor any notable sequence homology to the N-terminal connector (shown in bold) of Ena3A apart from a single CC-motif, (e) Domain organization of BclA (Q81JD7) and L-BclA and the corresponding theoretical lengths in fully extended state, (f) Comparison of the thickness of the hairy nap layer to the length of the L-ENA ruffles, (g) 2D class average of L-ENA fiber termini.

Table S1 CryoEM model and data statistics

|                                                                           | <i>Ex vivo</i> L-Ena<br>EMD-17579             | <i>rec</i> ENA3A<br>EMD-17627; PDB: 8PDZ      |
|---------------------------------------------------------------------------|-----------------------------------------------|-----------------------------------------------|
| Data collection and processing                                            | CryoARM300, BECM                              | CryoARM300, BECM                              |
| Magnification                                                             | 60.000                                        | 60.000                                        |
| Voltage (kV)                                                              | 300                                           | 300                                           |
| Electron exposure (e <sup>-</sup> /Å <sup>2</sup> )                       | 61.8                                          | 63.2                                          |
| Defocus range (μm)                                                        | -0.5 to -3.5                                  | -0.5 to -3.5                                  |
| Pixel size (Å)                                                            | 0.766                                         | 0.764                                         |
| Symmetry imposed                                                          | Helical<br>Rise = 43.820 Å<br>Twist = 17.041° | Helical<br>Rise = 44.970 Å<br>Twist = 18.547° |
| Number of segments used                                                   | 8715                                          | 454321                                        |
| Map resolution (Å)                                                        | 5.77 <sup>1</sup>                             | 3.32 <sup>1</sup>                             |
| FSC threshold                                                             | 0.143                                         | 0.143                                         |
| Local resolution (Å) (min, 25th percentile, median, 75th percentile, max) | 2.63, 4.23, 5.08, 6.66, 11.49                 | 2.84, 3.19, 3.71, 4.96, 8.28                  |
| Refinement                                                                |                                               |                                               |
| Initial model used                                                        | NA                                            | AlphaFold2                                    |
| Model resolution (Å)                                                      | NA                                            | 3.3                                           |
| FSC threshold                                                             | NA                                            | 0.143                                         |
| Model composition                                                         |                                               |                                               |
| Non-hydrogen atoms                                                        | NA                                            | 22288                                         |
| Protein residues                                                          | NA                                            | 3164                                          |
| B factor (Å <sup>2</sup> )                                                | NA                                            | 84.18                                         |
| R.m.s. deviations                                                         |                                               |                                               |
| Bond lengths (Å)                                                          | NA                                            | 0.004                                         |
| Bond angles (°)                                                           | NA                                            | 0.997                                         |
| Validation                                                                |                                               |                                               |
| MolProbity score                                                          | NA                                            | 1.47                                          |
| Clashscore                                                                | NA                                            | 8.74                                          |
| Poor rotamers (%)                                                         | NA                                            | 0                                             |
| Ramachandran plot                                                         |                                               |                                               |
| Favored (%)                                                               | NA                                            | 98.20%                                        |
| Allowed (%)                                                               | NA                                            | 1.80%                                         |
| Disallowed (%)                                                            | NA                                            | 0%                                            |
| Correlation coefficient                                                   |                                               |                                               |
| CC (mask)                                                                 | NA                                            | 0.72                                          |
| CC (box)                                                                  | NA                                            | 0.84                                          |
| CC (peaks)                                                                | NA                                            | 0.70                                          |
| CC (volume)                                                               | NA                                            | 0.71                                          |

<sup>1</sup> Numbers reflect the unsharpened map

Table S2. Plasmid constructs

| Name                       | Details                                                                           | Reference  |
|----------------------------|-----------------------------------------------------------------------------------|------------|
| <i>pMAD-I-SceI</i>         | Shuttle vector for making deletion mutant, carries I-SceI restriction site        | (5)        |
| <i>pMAD-I-SceI Δena3A</i>  | <i>pMAD-I-SceI</i> carrying homology sequences flanking <i>ena3A</i>              | this study |
| <i>pMAD-I-SceI ΔI-bclA</i> | <i>pMAD-I-SceI</i> carrying homology sequences flanking <i>I-bclA</i>             | this study |
| <i>pMAD-I-SceI ΔexsL</i>   | <i>pMAD-I-SceI</i> carrying homology sequences flanking <i>exsL</i>               | this study |
| <i>pBKJ233</i>             | Expresses I-SceI enzyme (promotes double cross over)                              | (6)        |
| <i>pHT304</i>              | Low-copy number plasmid for complementation                                       | (7)        |
| <i>pena3A</i>              | <i>pHT304::ena3A</i> (complementation of <i>B. paranthracis</i> <i>Δena3A</i> )   | this study |
| <i>pl-bclA</i>             | <i>pHT304::I-bclA</i> (complementation of <i>B. paranthracis</i> <i>ΔI-bclA</i> ) | this study |
| <i>pexsL</i>               | <i>pHT304::exsL</i> (complementation of <i>B. paranthracis</i> <i>ΔexsL</i> )     | this study |



Table S3. Overview of gene knockout mutants/complementation constructs

| <b>Name</b>                                                     | <b>Genetic background</b>                                  | <b>Reference</b> |
|-----------------------------------------------------------------|------------------------------------------------------------|------------------|
| Wild type                                                       | NVH0075-95                                                 | (8)              |
| $\Delta$ <i>exsL</i>                                            | NVH0075-95                                                 | this study       |
| $\Delta$ <i>l-bclA</i>                                          | NVH0075-95                                                 | this study       |
| $\Delta$ <i>ena3A</i>                                           | NVH0075-95                                                 | this study       |
| $\Delta$ <i>ena1ABC</i>                                         |                                                            | (8)              |
| $\Delta$ <i>ena1ABC</i> / $\Delta$ <i>ena3A</i>                 | NVH0075-95 $\Delta$ <i>ena1ABC</i>                         | this study       |
| $\Delta$ <i>exsL</i> :: <i>pexsL</i>                            | NVH0075-95 $\Delta$ <i>exsL</i>                            | this study       |
| $\Delta$ <i>lbcIA</i> :: <i>pl-bclA</i>                         | NVH0075-95 $\Delta$ <i>l-bclA</i>                          | this study       |
| $\Delta$ <i>ena3A</i> :: <i>pena3A</i>                          | NVH0075-95 $\Delta$ <i>ena3A</i>                           | this study       |
| $\Delta$ <i>enaABC</i> / $\Delta$ <i>ena3A</i> :: <i>pena3A</i> | NVH0075-95 $\Delta$ <i>ena1ABC</i> / $\Delta$ <i>ena3A</i> | this study       |

Table S4. List of primers

| Primer code                                                  | Sequence (5'-3')                                                                                         | Gene                         |
|--------------------------------------------------------------|----------------------------------------------------------------------------------------------------------|------------------------------|
| <b>Quantitative RT-PCR</b>                                   |                                                                                                          |                              |
| 2116/2117                                                    | AAGTGCCTAATCAACAAGGAAA/ GGGAAATCTCCCATGAACACA                                                            | <i>rpoB</i>                  |
| 2410/2411                                                    | TGGCAAACACGCCACCTT/ AATTGGCCTTTCTTAGTGTACCTG                                                             | <i>exsL</i>                  |
| 2428/2429                                                    | GCAGTAGGTATTGGTGCTGGT/ AAGCGGATACACTTAGAGCTGG                                                            | <i>l-bclA</i>                |
| 2414/2415                                                    | CGCAAATAGGAAATTGCTGCAC/ CGGTACCGCCAGTATCATCTAA                                                           | <i>ena3A</i>                 |
| <b>Determining operon</b>                                    |                                                                                                          |                              |
| 2311/2312                                                    | TGCTGACTTTTGTGGTTTGACT/GGGGCCTGTTTTCCCACTAA                                                              | <i>exsL</i> → <i>l-bclA</i>  |
| 2314/2315                                                    | ACAGTGCCTCAATCAGGGAG/CAGCTGTTGGTCCAACCTCA                                                                | <i>l-bclA</i> → <i>ena3A</i> |
| <b>Colony PCR screening of mutants and Sanger sequencing</b> |                                                                                                          |                              |
| 2241/2242                                                    | GGTTGGAGCTGCCTTAACAA/ TGAGGGGTCACCATATCAAAA                                                              | <i>ena3A</i>                 |
| 2311/2313                                                    | TGCTGACTTTTGTGGTTTGACT/ATCCTCCAACAGCTGTTCCG                                                              | <i>l-bclA</i>                |
| 2363/2364                                                    | TTCTTTGGTGGGGATGGGATT/ ACATCCAAGTGGTCCAGTGA                                                              | <i>exsL</i>                  |
| <b>Complementation</b>                                       |                                                                                                          | <b>Plasmid</b>               |
| 2374/2375                                                    | ACTATGAATTCATGTTTTTATATACTAAAACCAAACTTATAAAATGTTTATCCCGAA/<br>GTCAGTGAATTCTTACGAAACCCTAATGATTGTTAAGGCAGC | pHT304- <i>pl-bclA</i>       |

## References.

1. A. Punjani, J. L. Rubinstein, D. J. Fleet, M. A. Brubaker, cryoSPARC: algorithms for rapid unsupervised cryo-EM structure determination. *Nat Methods* **14**, 290-296 (2017).
2. L. S. Katz *et al.*, Mashtree: a rapid comparison of whole genome sequence files. *J Open Source Softw* **4**, (2019).
3. J. Schindelin *et al.*, Fiji: an open-source platform for biological-image analysis. *Nat Methods* **9**, 676-682 (2012).
4. E. Richard *et al.*, Protein complex prediction with AlphaFold-Multimer. *bioRxiv*, 2021.2010.2004.463034 (2022).
5. T. Lindbäck *et al.*, CodY, a pleiotropic regulator, influences multicellular behaviour and efficient production of virulence factors in *Bacillus cereus*. *Environ Microbiol* **14**, 2233-2246 (2012).
6. B. K. Janes, S. Stibitz, Routine Markerless Gene Replacement in *Bacillus anthracis*. *Infect. Immun.* **74**, 1949-1953 (2006).
7. O. Arantes, D. Lereclus, Construction of cloning vectors for *Bacillus thuringiensis*. *Gene* **108**, 115-119 (1991).
8. B. Pradhan *et al.*, Endospore Appendages: a novel pilus superfamily from the endospores of pathogenic Bacilli. *EMBO J* **40**, e106887 (2021).
