# Supplementary material for: Helical ultrastructure of the L-ENA spore aggregation factor of a Bacillus paranthracis foodborne outbreak strain
Source: PubMed Central journal article supplement — Nat Commun. 2024 Aug 29;15:7514. doi: 10.1038/s41467-024-51804-w (PMC11362473; doi:10.1038/s41467-024-51804-w), 2024-08-29
Supplement: 41467_2024_51804_MOESM3_ESM.pdf [file 41467_2024_51804_MOESM3_ESM.pdf]

## Description of Additional Supplementary Files

**File Name:** Supplementary Movie 1

**Description:** Flexibility analysis of L-ENA fiber segments identifies the L-ENA Ntcs as the hinge points between successive ring segments: visualized output of a 3D variability analysis job run in cryosparc filtered at 3.5Å resolution. The generated volumes for mode 1 were loaded into ChimeraX as a vseries and the resulting movie was saved as an .avi file.
